1  
2  
3  
4  
5  
6  
7  
8  
9  
10  
11  
12  
13  
14  
15  
16  
17  
18  
19

**Metatranscriptome profiling of the dynamic transcription of mRNA and sRNA  
of a probiotic *Lactobacillus* strain in human gut**

Jicheng Wang<sup>1†</sup>, Zhihong Sun<sup>1†</sup>, Jianmin Qiao<sup>1†</sup>, Dong Chen<sup>2†</sup>, Chao Cheng<sup>2†</sup>, Xiaotian Luo<sup>3</sup>, Jia  
Ding<sup>1</sup>, Jiachao Zhang<sup>1</sup>, Qiangchuan Hou<sup>1</sup>, Yi Zhang<sup>2,3\*</sup>, Heping Zhang<sup>1\*</sup>

<sup>1</sup> Key Laboratory of Dairy Biotechnology and Engineering, Ministry of Education, Inner Mongolia  
Agricultural University, Hohhot 010018, China.

<sup>2</sup> Center for Genome Analysis and <sup>3</sup> Laboratory for Genome Regulation and Human Health ,  
ABLife, Inc., Optics Valley International Biomedical Park, Building 9-4, East Lake High-Tech  
Development Zone, 388 Gaoxin 2<sup>nd</sup> Road, Wuhan, Hubei 430075, China.

\*Correspondence: Yi Zhang ([yizhang@ablife.cc](mailto:yizhang@ablife.cc)); Heping Zhang ([hepingdd@vip.sina.com](mailto:hepingdd@vip.sina.com))

†Equal contributors

20 **Abstract**

21 Metatranscriptomic sequencing has recently been applied to study how pathogens and probiotics  
22 affect human gastrointestinal (GI) tract microbiota, which provides new insights into their  
23 mechanisms of action. In this study, metatranscriptomic sequencing was applied to deduce the *in*  
24 *vivo* expression patterns of an ingested *Lactobacillus casei* strain, which was compared with its *in*  
25 *vitro* growth transcriptomes. Extraction of the strain-specific reads revealed that transcripts from  
26 the ingested *L. casei* were increased, while those from the resident *L. paracasei* strains remained  
27 unchanged. Mapping of all metatranscriptomic reads and transcriptomic reads to *L. casei* genome  
28 showed that gene expression *in vitro* and *in vivo* differed dramatically. About 39% (1163) mRNAs  
29 and 45% (93) sRNAs of *L. casei* well-expressed were repressed after ingested into human gut.  
30 Expression of ABC transporter genes and amino acid metabolism genes was induced at day-14 of  
31 ingestion; and genes for sugar and SCFA metabolisms were activated at day-28 of ingestion.  
32 Moreover, expression of sRNAs specific to the *in vitro* log phase was more likely to be activated  
33 in human gut. Expression of rli28c sRNA with peaked expression during the *in vitro* stationary  
34 phase was also activated in human gut; this sRNA repressed *L. casei* growth and lactic acid  
35 production *in vitro*. These findings implicate that the ingested *L. casei* might have to successfully  
36 change its transcription patterns to survive in human gut, and the time-dependent activation  
37 patterns indicate a highly dynamic cross-talk between the probiotic and human gut including its  
38 microbe community.

39

40 **Keywords:** Metagenomic, metatranscriptomic, probiotic, *Lactobacillus*, transcriptional regulation,  
41 gut microbiota

42

43 **Importance**

44 Probiotic bacteria are important in food industry and as model microorganisms in understanding  
45 bacterial gene regulation. Although probiotic functions and mechanisms in human gastrointestinal  
46 tract are linked to the unique probiotic gene expression, it remains elusive how transcription of  
47 probiotic bacteria is dynamically regulated after being ingested. Previous study of probiotic gene  
48 expression in human fecal samples has been restricted due to its low abundance and the presence  
49 of of closely related species. In this study, we took the advantage of the good depth of  
50 metatranscriptomic sequencing reads and developed a strain-specific read analysis method to  
51 discriminate the transcription of the probiotic *Lactobacillus casei* and those of its resident relatives.  
52 This approach and additional bioinformatics analysis allowed the first study of the dynamic  
53 transcriptome profiles of probiotic *L casei in vivo*. The novel findings indicate a highly regulated  
54 repression and dynamic activation of probiotic genome in human GI tract.

55

56

57 **INTRODUCTION**

58 Microbial communities form an intimate and beneficial association with human gastrointestinal  
59 (GI) tract (1-3). Human gut microbiota is of great significance in defending human diseases (4-7).  
60 Except for occasional invasion by pathogens, the unique gut microbial ecosystem is continuously  
61 exposed to transient microbes originated from diet; while diet can rapidly alter the gut microbial  
62 ecosystem (3, 8-10). Metagenomic and metatranscriptomic approaches have been recently  
63 emerged as a powerful way to study the impact of pathogens and diet on modulating the  
64 composition of human gut microbiota (11-13). However, it remains unclear how the  
65 transcriptomes of pathogens and transient microbes change after entering into the human GI tract.

66

67 Probiotic microorganisms are generally part of our transient microbiome, which commonly  
68 include bacterial strains in the genus *Lactobacillus*, *Bifidobacterium*, *Enterococcus*, and yeasts  
69 such as *S. boulardii* (14, 15). After it was coined in 1965, probiotic bacteria have been extensively  
70 studied for its wide utilization in dairy foods (16) and prophylaxis and control of a number of  
71 disease (17-19), which are primarily focused on their fate, activity and impact on the human gut  
72 microbiota (14, 20, 21). Probiotics have been reported to benefit human health in different ways.  
73 Probiotics' capability of rapidly metabolizing some carbohydrates to lactic acid, acetic acid or  
74 propionic acid may influence dietary carbohydrate degradation and alter metabolic output, for  
75 example, production of short chain fatty acids (SCFA) such as butyrate (14, 22, 23). Many  
76 probiotic can establish colonization resistance and competitive exclusion of pathogens (24). Some  
77 probiotics are reported to stimulate the human immune response (25-28). However, molecular  
78 mechanisms explaining these functions remain largely elusive. Interestingly, a metatranscriptomic  
79 study revealed an elevated expression of genes encoding enzymes for carbohydrate utilization in  
80 the mouse gut microbiota (29). It should be important to further study who express these probiotic  
81 function-related genes, the probiotic bacteria or certain resident microbes?

82

83 In general, the distinct probiotic functions and mechanisms should be linked to the gene expression  
84 from probiotic microorganisms. Study of the probiotic gene expression in the complicate gut  
85 microbe community using traditional methods has been prohibited both by its low abundance and  
86 by the presence of closely related species. A recent study has mapped metatranscriptomic reads  
87 obtained from elder volunteer fecal samples onto the the probiotic *L. rhamnosus GG ATCC 53103*,  
88 showing a good expression of LGG at 28-day of ingestion in a some elders (30). This report

89 promoted us to explore the possibility of using metatranscriptomic reads to study the dynamic of  
90 probiotic transcription in human gut.

91

92 In this study, we took the advantage of the good depth of metatranscriptomic sequencing reads  
93 obtained from fecal samples of healthy young volunteers before and during probiotic ingestion,  
94 and extracted strain-specific reads to discriminate the transcription of the probiotic *L. casei* and  
95 those of the resident *L. casei/paracasei* strains. Strain-specific read analysis showed that  
96 transcription of the probiotic *L. casei* was increased while those of its resident relatives remained  
97 unchanged. We further showed that transcriptome profiles of the resident *L. casei/paracasei* strains  
98 and ingested *L. casei* Zhang in human gut were strikingly different. The difference between all *in*  
99 *vivo* transcriptome profiles and those of *in vitro* samples was much more pronounced, and  
100 expression of about 40% of mRNAs and sRNA was repressed after being ingested. We observed  
101 activation of ABC reporters might be required for probiotic survival during the early stage of  
102 ingestion, and genes for sugar and SCFA metabolisms were activated during the later stage of  
103 probiotic ingestion. These novel findings underline a highly regulated repression and activation of  
104 probiotic genome after being ingested into human GI tract.

105

## 106 **Results**

107

### 108 **Experimental design for studying the *in vivo* transcription of an ingested probiotic bacteria**

109 In this study, we used *L. casei* Zhang as a model to study the *in vivo* transcription dynamics of  
110 ingested probiotics (Figure 1a). We collected metatranscriptomic reads from the fecal samples  
111 taken from six healthy young volunteers (20 to 30 years old, three male and three female) in an

112 open-label clinical trial. The fecal samples were taken on day 0 prior to the consumption and on  
113 day 14 and 28 after consumption. Metatranscriptomic cDNA libraries were constructed by  
114 respective extraction of RNA from the 18 samples. As controls, we obtained three replicated  
115 transcriptomes of *L. casei* Zhang in tablet form prior to the ingestion (Table S1). In order to assess  
116 the growth condition of the probiotic in gut microbial community, we additionally sequenced the  
117 transcriptomes of *L. casei* cells growing *in vitro* at the lag, log, stationary and death phases (Table  
118 S1).

119  
120 Metatranscriptomic studies of the transcriptional response of gut microbiota in healthy human to  
121 the *Lactobacillus* probiotic consumption resulted in controversial observations. One study shows  
122 that variation among persons was the biggest reason of transcriptome variation (31), while another  
123 study suggests that the transcriptional response of gut microbiota was modulated by probiotic  
124 treatment (32). We explored how *L. casei* Zhang affected the transcription/function of our  
125 volunteers' gut microbiotas by analyzing the metatranscriptomic data obtained from the same fecal  
126 samples as those of the metagenomic data. Expression correlation analysis showed a large inter-  
127 individual variation among metatranscriptomes (Figure 1b). The probiotic-induced change of  
128 metatranscriptomes was much smaller than the inter-individual variations (Figure 1b), confirming  
129 the lack of a global transcriptional response by probiotic ingestion (31).

130  
131 Using the genome of *L. casei* Zhang as the reference sequence, we mapped the transcriptome reads  
132 from all *in vitro* cultured *L. casei* Zhang, as well as the *in vivo* metatranscriptome and metagenomic  
133 samples. About 37.61%-71.62% of transcriptomic reads from *in vitro* cultured *L. casei* Zhang were  
134 mapped. The mapping efficiency varied with the culture condition, with the log-phase samples

135 showing the highest efficiency and tablet samples showing the lowest efficiency (Figure 1c). As  
136 high as a few percent of *in vivo* metatranscriptomic reads were mapped onto the genome sequence  
137 of *L. casei* Zhang after ingestion (Figure 1d). It is shown that mapping results of  
138 metatranscriptomic reads were increased in an ingestion time-dependent manner (Figure 1d).  
139 Further analysis showed that the base level of mapped reads could be resulted from the presence  
140 of closely related strains of *L. casei* Zhang, particularly *L. paracasei* subsp. *paracasei* 8700:2, *L.*  
141 *paracasei* subsp. *paracasei* ATCC 25302 (Figure 1e).

142

143 **Transcripts from the ingested *L. casei* Zhang increase significantly while those from the**  
144 **resident *L. casei/paracasei* strains remain unchanged**

145 To further distinguish the transcriptional response of resident *L. casei/paracasei* to *L. casei* Zhang  
146 ingestion, we only extracted the reads mapped to *L. casei* Zhang, *L. paracasei* subsp. *paracasei*  
147 8700:2 and *L. paracasei* subsp. *paracasei* ATCC 25302, which resulted in strain-specific reads.  
148 Plot of the strain-specific reads showed that *L. paracasei* subsp. *paracasei* ATCC 25302 strain  
149 was the most-enriched strain prior to *L. casei* Zhang ingestion. It was interesting to find that,  
150 although not dominant, a significant fraction of reads specifically mapped to *L. casei* Zhang in  
151 each individual, indicating that *L. casei* Zhang is one *Lactobacillus* strain well adapted to human  
152 gut microbe community (Figure 2a).

153

154 The overall transcripts from *L. casei* Zhang were increased with the ingestion time, which was  
155 anticipated from the successful ingestion of exogenous *L. casei* Zhang. In contrast, the overall  
156 transcripts from the other two resident *L. casei/paracasei* did not change during the course of  
157 investigation (Figure 2b). Consequently, as the fraction of reads mapped to *L. casei* Zhang

158 increased significantly during the course of probiotic ingestion, the resident *L. casei/paracasei*  
159 strains decreased (Figure 2c). We therefore concluded that the metatranscriptomic reads mapped  
160 to *L. casei* Zhang were dominantly expressed from the ingested *L. casei* at day-14 and day-28.

161  
162 We then selected several genes for absolute quantitative PCR analysis, including  $\beta$ -galactosidase  
163 for galactose metabolism and RNA polymerase  $\beta$  subunit (rpoB). Primer for these genes were  
164 designed to detect both the ingested and resident *L. casei/paracasei*. Figure 2d shows that all of  
165 these genes were higher for the resident *L. casei/paracasei* (day-0) and lower after the ingested.  
166 Their levels in tablets were low and similar as those from human gut after being ingested.  
167 Therefore, the transcription pattern of the ingested *L. casei* inherits some of its *in vitro* growth  
168 patterns.

169  
170 Taken together, our mapping results reflected a combined transcription from both the ingested and  
171 resident *L. casei/paracasei* strains. We decided to use all reads mapped onto the genome of *L. casei*  
172 Zhang for the following analysis given the following two reasons. First, the specific reads  
173 represented only a very small fraction of the transcriptome and genes. Therefore, gene expression  
174 level is hardly to be calculated from the strain-specific reads. Second, transcription from the resident  
175 *L. casei/paracasei* strains was repressed after probiotic *L. casei* ingestion. Therefore, the observed  
176 increase was primarily from *L. casei* Zhang.

177  
178 **Gene expression patterns of *L. casei/paracasei* *in vivo* are distinct from those *in vitro***

179 To explore the *in vivo* transcription profiles of different states of the ingested *L. casei/paracasei*,  
180 we first compared the expression of *L. casei* Zhang among all the *in vivo* and *in vitro* samples.



181 Principal Component Analysis (PCA) of the expression profiles revealed that all *in vitro*  
182 transcriptomes were well separated from the *in vivo* transcriptomes by the first component, which  
183 indicated a substantial difference between the *in vivo* and *in vitro* transcriptions of *L.*  
184 *casei/paracasei* (Figure 3). For the *in vivo* samples, day-28 and day-0 samples were well separated  
185 by their transcription profiles (first and second components). However, the patterns of *L.*  
186 *casei/paracasei* transcription in the day-14 samples were highly divergent, probably indicating a  
187 highly dynamic stage for *L. casei/paracasei* transcriptomes responding to the newly ingested *L.*  
188 *casei* Zhang.

189  
190 Plot of the expression correlation between any two samples showed two major convergent clusters  
191 and three minor divergent cluster (Figure S1). The largest major cluster was composed of all *in*  
192 *vitro* grown samples, and the second major cluster was composed of most day-28 fecal samples.  
193 One minor cluster was composed of 4 day-0 fecal samples. The other day-0 and all day-14 samples  
194 were highly convergent, constituting the other two minor clusters and suggesting a highly  
195 divergent fates of the ingested *L. casei* Zhang in different individuals, at day-14 of ingestion. These  
196 results were consistent with those of the PCA plot (Figure S1).

197  
198 **The transcription modules and dynamics of gut *L. casei/paracasi* genes differentially**  
199 **expressed upon probiotic ingestion**

200 To explore the transcription dynamics of *L. casei/paracasei* stain in human gut in response to the  
201 *L. casei* ingestion, we applied edgeR to compute the differentially expressed genes (DEGs) among  
202 three groups of metatranscriptomes at day-0, day-14 and day-28. A total of 1091 such DEGs were  
203 obtained using a cut off of fold change  $\geq 2$  and  $p$ -value  $\leq 0.01$ . To reveal the transcription patterns

204 of *L. casei/paracasi* DEGs in human gut, WGCNA (weighted gene co-expression network analysis)  
205 was used to analyze their expression correlation network. Two major (turquoise and blue) and  
206 three minor (green, yellow and brown) expression modules were resulted (Figure 4A).

207  
208 To visualize the transcriptional dynamics of these DEG modules, we plotted their dynamic  
209 expression patterns using RPKM (reads per kilobase per million total reads) of each gene as input.  
210 Heatmap plot showed that the expression pattern of all these DEGs was similar in all six  
211 individuals prior to the ingestion of *L. casei* Zhang (day-0) (Figure 4B). The pattern at day-28 after  
212 the ingestion was also similar to each other but dramatically different from that of day-0. However,  
213 the transcription patterns were quite divergent at day-14 after the ingestion, among which four  
214 were more similar to the pattern of day- 0 and two to that of day-28 (Figure 4). The heatmap  
215 dynamics well captured the PCA analysis results are shown in Figure 3. Meanwhile, this heatmap  
216 dynamics showed that the brown, yellow and green modules largely represented the individual-  
217 specific expression clusters.

### 218 219 **The transcription modules of *the vivo* DEGs and their associated functional clusters**

220 We further explored the transcription patterns of their major co-expression modules using  
221 eigengene values. The module eigengene E value can be considered as a representative of the gene  
222 expression profiles in a module. Eigengene pattern of turquoise module (450 genes) showed that  
223 genes in this module were better expressed among all six day-0 samples and four day-14 samples,  
224 when compared to the very low level in day-28 samples (Figure 5A). The expression value in day-  
225 0 of individual B was higher than other day-0 individuals. The expression in three of four day-14  
226 samples were generally higher than their corresponding day-0 samples of the same individuals

227 (Figure 5A, upper panel). This expression pattern was varied similar to those reflected by heatmap  
228 profiling the RPKM expression values of all DEGs (Figure 4B). These observations suggested that  
229 genes in turquoise module represented the resident *L. casei/paracasei* expression, which might be  
230 transiently stimulated by the ingested *L. casei* Zhang at early time (day-14) but repressed at later  
231 time (day-28).

232  
233 GO functional analysis showed that genes in turquoise module were enriched in transmembrane  
234 transport ( $p$ -value,  $7.92e-12$ ) (Figure 5A, middle panel). Genes in amino acid transmembrane  
235 transport and carbohydrate transport were enriched as well. KEGG analysis indicated that most  
236 transmembrane transport genes were ABC transporters (Figure 5A bottom panel). Another class  
237 of function more expressed by the resident *L. casei/paracasei* strains were metabolic genes (Figure  
238 5A bottom panel), indicating that the metabolic function of the resident *L. casei/paracasei* could  
239 be altered upon probiotic expression.

240  
241 Eigengene expression pattern of blue module (444 genes) showed specific expression among all  
242 six day-28 samples and 2 day-14 samples (individuals C and D) (Figure 5B), indicating that these  
243 genes were either induced by or specifically expressed from the ingested *L. casei* Zhang.  
244 Functional clustering analysis showed that these genes were enriched in sugar metabolism and  
245 transport functions including phosphoenolpyruvate-dependent sugar phosphotransferase system  
246 (GO, 34 genes,  $p$ -value  $\leq 1.78e-9$ ), carbohydrate transmembrane transport (GO, 31 genes,  $p$ -value  
247  $\leq 7.22e-8$ ) and Galactose metabolism (KEGG, 22 genes,  $p$ -value  $\leq 2.64e-5$ ) (Figure C middle  
248 and bottom).

249

250 Eigengene expression pattern of brown module (92 genes) were similar to that of blue module,  
251 with a major difference in gene expression pattern for individual F at day-14. In addition to the  
252 sugar metabolic function, Brown module genes were mostly enriched in ribosome and translational  
253 function ([Figure S2](#))

254

### 255 **Comparison of the genome expression patterns of *L. casei* *in vitro* and in human gut**

256 We next compared the transcriptome of *L. casei* *in vitro* and in human gut. We were aware the *in*  
257 *vivo* expression of *L. casei* was mixed by a fraction of resident *L. casei/paracasei*. Differentially  
258 expressed genes were obtained inside of the *in vivo* or *in vitro* groups, as well as between the *in*  
259 *vivo* and *in vitro* groups, which were subjected to WGCNA network analysis. Almost all *L. casei*  
260 genes (97.22%; 2871/2953) were subjected to the transcriptional regulation during *in vitro* and *in*  
261 *vivo* growth of the probiotic ([Figure 6a](#)). It demonstrated that M1 module contained 948 genes,  
262 representing 32.1% of all *L. casei* genes, expressed very well when grown *in vitro*, but strongly  
263 repressed when grown in human gut. These genes were expressed at relative higher level in two  
264 day-14 samples (individuals A and F), which could reflect transcripts from the transiently passed  
265 *L. casei* after being ingested. M1 module genes were enriched in KEGG pathways for translation  
266 and replication ([Figure 6b](#)).

267

268 Expression of *L. casei* Zhang genes in M2 modules (839) was induced at day-14 of three samples.  
269 These genes were strongly enriched in ABC transporters and metabolism pathways of multiple  
270 amino acids ([Figure 6c](#)), suggesting the possible presence of a transition stage, during which the  
271 ingested *L. casei* Zhang has to alter its uptake function to adapt the human gut environment. Genes  
272 in M2 modules were highly overlapped with the genes in turquoise module shown in [Figure 5a](#).

273  
274 At day-28, the late stage of ingestion, expression of a cluster of genes (226) was specifically  
275 increased (M3 module). These genes were involved in the biosynthesis and/or metabolism of the  
276 well-known probiotic molecular including galactose (20), carbohydrate utilization (33) and  
277 metabolism of propanoate the key member of SCFA (34) (Figure 6d). We found *L. casei* genes for  
278 ascorbate and aldarate metabolism were globally upregulated, suggesting a novel class of probiotic  
279 molecule. Genes in M4 module (215) were mostly expressed in the tablet form of *L. casei*, and  
280 their level in human gut was increased at the late stage of ingestion (Figure 5e). M4 genes were  
281 most strongly enriched in the metabolism of butanoate, another key member of SCFA synthesis  
282 (35).

283

#### 284 **Dynamic expression of sRNA genes of *L. casei* Zhang *in vitro* and *in vivo***

285 Given the regulatory function of bacterial sRNAs(36), we then studied the possible contribution  
286 of sRNA to the highly dynamic transcriptome of *L. casei* Zhang. A total of 208 candidate sRNAs  
287 were identified from the *in vitro* grown cells. Among these candidate sRNAs, 76 were identified  
288 from all 4 stages and 143 were identified from at least two growth stages (Figure 7a). Heatmap  
289 plot of the expression patterns of all sRNAs under the *in vitro* growing states showed that although  
290 most sRNAs were expressed at multiple growth conditions, stage-specific expression of sRNAs  
291 were prevalent for *L. casei* (Figure 7b). Lag-phase, log-phase, death-phase, and tablet-phase sRNA  
292 clusters were highly specific (Figure 7b). Interestingly, stationary phase did not contain its-specific  
293 sRNA, and it rather expressed sRNA specific for the log and death phases at relatively high levels  
294 (Figure 7b).

295

296 When *L. casei/paracasei* was expressed in human gut, expression of sRNAs was clearly separated  
297 into two clusters. The M1 sRNAs decreased their expression after the ingestion while the M2  
298 sRNAs increased their expression, in comparison with the sRNA expression in the tablets (Figure  
299 7c). The *in vivo* M1 sRNAs contained sRNAs specifically expressed at each of the four *in vitro*  
300 grown stages at an unbiased frequency, while M2 sRNAs were mainly those of the *in vitro* log  
301 phase sRNAs (Figure 7c). This observation suggested that the *in vivo* growing state of *L.*  
302 *casei/paracasei* might resemble the *in vitro* log phase.

303

304 Rli28 is a small RNA that is detected in *Listeria monocytogenes* grown in stationary phase and in  
305 the intestinal lumen of its infected mice and proposed to be involved in the bacterial virulence (37).

306 We identified five copies of rli28 expressed from the genome of *L. casei* Zhang, ranging from 210  
307 bp to 492 bp and located in two separated loci (Table S2). We plotted the levels of rli28 genes in  
308 the *in vitro*-grown *L. casei* Zhang and the *L. casei/paracasei* grown in human gut varied greatly  
309 (Fig. 7e; Figure S3). The *in vitro* expression patterns of these rli28 genes of *L. casei* Zhang differed  
310 significantly, with one being peaked at the log phase (rli28e), two at the stationary phase (rli28c  
311 and rli28d), and two at both the stationary and death phases (rli28a and rli28b). Expression of four  
312 rli28 genes in human gut was constantly increased with the ingested time, while rli28a gene was  
313 decreased in its expression at day-28.

314

315 Rli28c peaked at the stationary phase was chosen for further functional analysis (Fig. 7f). After  
316 rli28c being knocked out using Cre/LoxP cassette, the *in vitro* growth of the mutant *LcZ* was  
317 enhanced compared to the wild-type (Fig. 7f). Meanwhile, the growth medium pH of the mutant  
318 *LcZ* was lower than the wild-type, consistent with an enhanced release of the lactic acid. Taken

319 together, these results suggested that the stationary phase *rli28c* may repress the growth and the  
320 production of lactic acid by *L. casei*.

321

## 322 **Discussion**

323

324 Exploring the fate of ingested probiotics thoroughly at transcriptional level remains challenge thus  
325 far. To our best knowledge, this study presented the first effort to profile the transcription of mRNA  
326 and sRNA of probiotic and resident *Lactobacillus* in human gut, by extracting the transcriptome  
327 reads of the probiotic bacteria from metatranscriptomic reads. Classical metatranscriptomic  
328 analysis shows that the ingested probiotic bacteria does not alter the global composition of gut  
329 microbial community to any appreciable level compared to the individual variations, consistent  
330 with the previous results (31, 32, 38-40). Comprehensive comparative transcriptome analysis was  
331 performed in human fecal samples at different time points of ingestion, and between the *in vivo*  
332 and *in vitro* growth states. These comparative transcriptomic and metatranscriptomic studies led  
333 to some interesting findings.

334

### 335 **The resident *L. casei/paracasei* strains transcribe differently from the ingested probiotic *L.*** 336 ***casei* strain**

337

338 It has been nearly impossible to study the transcriptome of individual strains among the large  
339 microbial community in human gut previously (41). In this study, we have used deep sequencing  
340 technology to obtain metatranscriptomes of human gut microbiota from the fecal samples of six  
341 healthy volunteers, followed by mapping the metatranscriptomic reads onto the genomes of the

342 ingested *L. casei* Zhang and its two close relatives *L. casei/paracasei* strains. This approach  
343 allowed us to compare the transcription of the ingested *L. casei in vitro* and its close relatives in  
344 human gut (day-0 samples), demonstrating that transcription of both mRNAs and sRNAs differ  
345 greatly *in vitro* and *in vivo*.

346

347 We have also applied strain-specific reads to distinguish the transcripts from three closely related  
348 *L. casei/paracasei* strains, indicating that the increased mapping of metatranscriptomic reads is  
349 primarily derived from the ingested *L. casei*. We proposed that a combination of increased  
350 metatranscriptomic sequencing depth and stain-specific mapping strategy might allow a higher  
351 resolution of the transcriptomes of various microbe strains in human and other mammals, as well  
352 as the transcriptome dynamics in response to the exogenous bacteria, in the future.

353

#### 354 **The fate of the ingested *L. casei*: death/lysis or changing the transcription pattern**

355 Probiotic microorganisms can generally survive well when they pass through the stressful GI tract  
356 conditions in a few hours, and stay in colon for a few days (14, 15, 25). Microbial cells that cannot  
357 survive the GI tract undergo cell lysis (14, 42). It is unclear what is going on at the transcriptome  
358 level when the probiotics were ingested. In this study, we have demonstrated that transcription of  
359 the ingested *L. casei* does not inherit the *in vitro* transcription pattern at all. Moreover, transcription  
360 patterns at day-14 and day-28 differ significantly.

361

362 These findings have an important implication regarding the fate of ingested bacteria and what we  
363 are detecting from the fecal samples. It is generally worried that during the course of probiotic  
364 uptake, the majority of probiotics that we detected from fecal samples are the dead bacteria after



365 being ingested. However, the distinct transcription patterns between *in vitro* and *in vivo*, as well  
366 as between those after 14 days and 28 days of probiotic uptake, strongly suggest that the detected  
367 probiotic transcriptomes reflect those have survived the GI tracts. Our results support the previous  
368 hypothesis of the cell lysis for the dead ingested bacteria (20, 42). We do not exclude the possibility  
369 that the dead probiotic bacteria might still yield fragmented DNA signals. However, the dead  
370 probiotic *L. casei* unlikely yield RNA signals according to our reported transcription patterns. In  
371 conclusion, this study suggests that transcriptome analysis represents a more effect way for  
372 detecting the living bacteria in fecal samples.

373

374 **Activation of ABC reporters might be required for probiotic survival during the early stage**  
375 **of ingestion**

376

377 ATP-binding cassette (ABC) transporters represent one of the largest classes of transporters using  
378 the power from ATP hydrolysis to drive the translocation of different substrates across cell  
379 membranes (43). ABC transporters not only transport a large variety of nutrients into cells from  
380 environments, but also transport various cellular components away from the cells. For example,  
381 multidrug ABC transporters transport a wide range of drugs from cell (44). In this study, we found  
382 that in three day-14 and one day-0 fecal samples, genes encoding ABC reporters were globally  
383 activated in *L. casei*, compared with their expression under *in vitro* growth condition. As we have  
384 shown, upon *L. casei* Zhang ingestion, the increased *L. casei* mapping is from the ingested *L. casei*.  
385 The increased expression of ABC transporters should therefore indicate that the *L. casei* Zhang  
386 survived GI tracts has changed its expression pattern favoring the expression of ABC transporters.

387 Activation of the expression of ABC transporters might enhance the ability of ingested *L casei* in  
388 uptaking of nutrient from the human gut environment.

389

390 It is known that human gut microbes establish direct chemical interactions with host (45). It could  
391 be possible that the signals for the global activation of ABC transporters were sent by the gut  
392 microbial community, reflecting its early cross-talk with the ingested probiotic. On the other hand,  
393 activation of ABC transporters could also reflect how the ingested *L casei* respond to the living  
394 condition in human gut.

395

396 **Genes for sugar and SCFA metabolisms are activated during the later stage of probiotic**  
397 **ingestion**

398

399 Interestingly, we observed a clear shift of transcriptional patterns between day-14 and day-28  
400 samples, in which the activated expression of ABC transporter disappeared and activated  
401 expression of genes for galactose and sugar metabolism appeared. This shift indicates a dynamic  
402 cross-talk between ingested *L. casei* and human gut microbiota. It could be possible that the early  
403 cross-talk elicits a signal for activated expression of ABC reporters. However, as *L. casei* uptake  
404 continues, the interaction between the ingested *L. casei* and human gut microbes has been  
405 established, the signal for activation of ABC transporters of the ingested *L. casei* might then lose.  
406 Instead, signals for galactose and sugar metabolism are secreted, be sensed and reacted by the  
407 ingested *L. casei*.

408

409 Human gut microbiome is developed with its host after birth, which modulates the host metabolic  
410 phenotype(45). The host and microbiome establish metabolic axes resulting in combinatorial  
411 metabolism of substrates by the microbiome and host genome, which produce various metabolites  
412 such as bile acids, choline, and short-chain fatty acids (SCFAs) that are essential for host health  
413 (46, 47). It is interesting to observe that at the later stage of the ingestion of probiotic *L. casei*  
414 genes for galactose and sugar metabolism, as well as those for the metabolism of one class of  
415 SCFAs propanoate (48, 49) were globally activated. These findings are consistent with the current  
416 knowledge that probiotic bacteria can contribute metabolites such as acetate, lactate and  
417 propanoate (14, 50, 51). A number of reports have shown that *Lactobacillus* strains produce SCFAs  
418 (52, 53). The increase in propionic acid is dependent on the intake time, much more pronounced  
419 after 3 weeks of intake than after eight days, which agrees well with our observed time-dependent  
420 activation of genes for propanoate metabolism.

421

#### 422 **The highly regulated expression of *L. casei* sRNAs and growth repression by sRNA *rli28***

423

424 Small RNAs represent a large class of novel regulatory molecules in bacteria (36, 54). The sRNAs  
425 in *Lactobacillus* have not been well characterized before. In this study, we have identified 208  
426 sRNAs in *L. casei* Zhang growing under four different growth stages *in vitro*, among which 76  
427 were all overlapped. Almost all sRNAs display a stage-specific growth pattern, which agrees well  
428 with the regulatory roles of sRNAs (55, 56).

429

430 After the intake, we found that sRNAs highly expressed in the death and stationary phases were  
431 well expressed in human gut. By creating a lox knock-out *L. casei* Zhang, we have shown that one

432 copy of rli28 who best expressed in stationary phase inhibits *L. casei* growth *in vitro*. This suggests  
433 that sRNAs could regulate the bacterial growth rate.

434

## 435 **Conclusions**

436 Study the transcription of the ingested probiotic in human gut using the metatranscriptome  
437 profiling approach has shown that the probiotic strain transcribes in a unique way different from  
438 its *in vitro* transcription and the *in vivo* transcription of the closely related species. Expression of  
439 about 40% of mRNAs and sRNAs is repressed, while genes encoding ABC transporters and those  
440 in sugar and SCFA metabolisms are activated at the early and later stages of ingestion, respectively.  
441 The unique transcription pattern of the probiotic bacteria *in vivo* might shape their characteristics  
442 of being transient passenger without much affecting of the resident gut microbiota. These findings  
443 together underline the presence of a dynamic crosstalk between the probiotic and human gut  
444 including the microbial community, which ensures a tightly regulated expression of the probiotic  
445 genome *in vivo*, which are worth of further studies in the future. Moreover, the developed  
446 methodology can be extended to study the *in vivo* expression of probiotics and pathogens.

447

448

## 449 **Methods**

### 450 **Subjects and study design**

451 Subjects were asked to orally intake 4 probiotic tablets consisting of a total of  $10.6 \text{ Log}_{10} \text{ CFU } L.$   
452 *casei* Zhang daily from Day 0 to 28. Fecal samples were collected from the subjects on Days 0, 14  
453 and 28 in sterile containers and were kept refrigerated. Samples were transported on ice to the  
454 laboratory within 2 hours, and were kept at  $-80^{\circ}\text{C}$  until further analysis.

455

456 **Stool collection, storage, fecal RNA extraction and sequencing.**

457 Stool samples were respectively collected before and after a 4-week consumption period. Gut  
458 microbiota were sampled by non-invasively fecal collection. Stool samples were taken in duplicate  
459 by coring out feces with inverted sterile 1 mL pipette tips. These tips were then deposited in 15  
460 mL Falcon tubes. Samples collected at home were stored temporarily at  $-20^{\circ}\text{C}$  until transported  
461 to the laboratory and then stored in  $-80^{\circ}\text{C}$  freezers. Subject samples collected abroad were stored  
462 at  $-20^{\circ}\text{C}$ , shipped to the company on dry ice, and then stored at  $-80^{\circ}\text{C}$ . Total RNAs were treated  
463 with RQ1 DNase (promega) to remove DNA. The quality and quantity of the purified RNA were  
464 determined by measuring the absorbance at 260 nm/280 nm (A260/A280) using smartspec plus  
465 (BioRad). RNA integrity was further verified by 1.5% Agrose gel electrophoresis. For each sample,  
466 5  $\mu\text{g}$  of total RNA was used for RNA-seq library preparation. Ribosomal RNAs were depleted  
467 with Ribo-Zero<sup>TM</sup> rRNA depletion kit (Epicentre, MRZB12424) before used for directional RNA-  
468 seq library preparation (gnomegen K02421-T). Purified mRNAs were iron fragmented at  $95^{\circ}\text{C}$   
469 followed by end repair and 5' adaptor ligation. Then reverse transcription was performed with RT  
470 primer harboring 3' adaptor sequence and randomized hexamer. The cDNAs were purified and  
471 PCR amplified. PCR products corresponding to 200-500 bps were purified, quantified and stored  
472 at  $-80^{\circ}\text{C}$  until used for sequencing.

473

474 ***In vitro* sample RNA extraction, library construction and sequencing**

475 For the *in-vitro* bacterial samples, we collected the samples by two different styles. As for the first  
476 style, we cultured the *L. casei* Zhang on the medium and collected two replicate samples from each  
477 of the four growth stages, lag, log, stationary, and death stage, respectively. For the second, we

478 collected the samples from the probiotic tablets same as the above, and three replicates were  
479 prepared. After sample collection, total RNAs were extracted from samples mentioned above by  
480 using Trizol Reagent (Invitrogen). Then we used Ribo-Zero rRNA removal kit to remove the  
481 rRNAs. After that, extracted RNA was amplified using custom barcoded primers and sequenced  
482 with paired-end 100 bp reads by Illumina HiSeq2500 platform.

483

#### 484 **Quality filtering and sequence statistics**

485 After sequencing, raw reads would be first discarded if containing more than 2-N bases, then reads  
486 were processed by clipping adaptor, removing low quality reads and bases from the end of each  
487 reads and discarding too short reads (less than 16nt) by FASTX-Toolkit (Version 0.0.13). The  
488 metagenomic, metatranscriptomic and the *in vitro* samples were filtered with the same method and  
489 parameters.

490

#### 491 **Data validation by qPCR**

492 Genomic DNA and total RNA were extracted from fecal samples of each volunteer. To validate  
493 genes copy number from metagenomic sequencing, quantitative Polymerase Chain Reaction  
494 (qPCR) was applied to detect the relative copy numbers using ABI Prism 7300 Real-Time PCR  
495 System with standard procedures. A known fragment, containing 3'-UTR of RORA gene (human)  
496 was inserted into psiCHECK 2 plasmid. The plasmid was added into each sample by quantitation,  
497 and detected as an external control by specific primers. The relative level of DNA level was  
498 analyzed after being normalized by the external control.

499 For metatranscriptomic mRNA detection, total RNAs was extracted from the same fecal samples  
500 of each volunteer for sequencing. To ensure there was no genome DNA contamination, RNA was

501 treated with DNase 1 (Takara) for 2h, and then applied to PCR validation. The mRNA fragments  
502 of  $\beta$ -actin (human) obtained by in vitro Transcription (Transcript Aid T7 High Yield Transcription  
503 Kit, Thermo Scientific) was added into each RNA samples and applied to the reverse-transcribed  
504 by random hexamer primers using M-MLV reverse transcriptase (Promega). RT-qPCR was  
505 performed using ABI Prism 7300 Real-Time PCR System with standard procedure, and the  
506 relative expression level of genes were normalized by  $\beta$ -actin. The PCR primers were provided in  
507 [Table S3](#).

508

### 509 **HMP database retrieval**

510 We chose HMP database (<http://hmpdacc.org/>) as reference to do the structural and functional  
511 analysis. First, we downloaded the complete genome sequences and annotation of human gut  
512 microbiome, which contains 358 publicly available human microbiome genomes generated from  
513 the National Institutes of Health (NIH) Human Microbiome Project and the European MetaHIT  
514 consortium. Besides, we added the *L. casei Zhang* genome (<http://www.ncbi.nlm.nih.gov/>) to the  
515 database to evaluate the influence of *L. casei Zhang* to the microbiome. We then aligned our  
516 metagenomic and metatranscriptomic data to the genomes with bowtie2(57), allowing no more  
517 than one mismatch. To deal with cases of multiple mapping, we selected no more than 10 best  
518 matches of the alignment based on the mapping quality, and then we divided the reads by its hits  
519 number, and each hit occupied one part of the reads. After that, we calculated the reads number  
520 and RPKM value for each contig and gene in the database. We then obtained the abundance of  
521 different taxonomic levels from species to kingdom by adding relative contigs abundance together.  
522 To consistently estimate the functional composition of the samples, we annotated the genes from  
523 the HMP database using COG orthologous groups and KEGG pathways by blastx program with

524 e-value 1e-5. We ensured that comparative analysis using these procedures was not biased by data-  
525 set origin, sample preparation, sequencing technology and quality filtering.

526 For metatranscriptomic gene abundance, to study gene expression alteration changed by the *L.*  
527 *casei Zhang*, we compared the expression change between day 14 and day 0, day 28 and day 0 and  
528 day 28 and day 14. First, we got differentially expressed species and extracted all genes abundance  
529 from these species, and then obtained the differentially expressed genes. We then used  
530 WGCNA(58) method to classify the differentially expressed genes as modules based on their  
531 expression pattern. After classification, we used the annotation of KEGG to obtain the functional  
532 enrichment pathways by hypergeometric test.

533

#### 534 ***In vivo* and *in vitro* samples co-analysis**

535 To find the transcriptome difference of *L. casei Zhang* between *in-vivo* and *in-vitro* samples, we  
536 compared the gene expression difference among these samples by aligning the transcriptome reads  
537 to the *L. casei Zhang* genome. We used bowtie2(57) software to align reads to the *L. casei Zhang*  
538 genome allowing 1 seed mismatch. RPKM value for each gene was calculated for each sample.  
539 Then we compared the gene expression changes between each samples groups with each other by  
540 edgeR (59) package. Samples *in-vivo* of each point was compared with samples *in-vitro* of each  
541 stage and type, and samples *in-vivo* was compared with each other, samples *in-vitro* was compared  
542 with each other. We then used WGCNA(58) method to classify the differentially expressed genes  
543 as modules based on their expression pattern. After classification, we used the annotation of KEGG  
544 to obtain the functional enrichment pathways by hypergeometric test.

545

#### 546 **Bacteria sRNA prediction and expression analysis**



547 To have an exact prediction of *L. casei* Zhang sRNAs, we developed an algorithm to detect peaks  
548 from alignment results among intragenic, intergenic (between two adjacent genes) and antisense  
549 regions. We used the RNA-seq data from four stage bacterial strain cultured on the medium. We  
550 merged the mapping result file from the same stage, and ran the computer program separately for  
551 the four stages. After prediction, we merged the sRNAs predicted from the four stages by genomic  
552 locations and got a final sRNA prediction result. The detail description of algorithm is described  
553 below. Based on the alignment result, 5 bp window size was chosen as the default window size.  
554 Peak starting site was identified as the end of one window, the median depth of which is no more  
555 than 0.25 fold of all of the adjacent downstream eight windows. Peak terminal site was identified  
556 as the start of one window whose median depth is no more than 0.25 fold of all of the adjacent  
557 upstream eight windows. After the algorithm realization, we then filtered the peaks according to  
558 the following three thresholds: 1) the length of peaks should range from 40bp to 500bp; 2) the  
559 maximum height of one peak should be no less than 60 read depth; 3) the medium height of one  
560 peak should be no less than 20 depth. After peak definition, we classified the peaks into three  
561 different classes according to their locations: 1) intragenic peaks whose locus were overlapped  
562 with known mRNA genes and on the same strand; 2) antisense peaks were defined as peaks whose  
563 locus were overlapped with known mRNA genes but on the opposite strand; 3) intergenic peaks  
564 whose locus were neither overlapped with known mRNAs on the same strand nor on the opposite  
565 strand. Antisense and intergenic peaks were defined as sRNAs. We aligned the sRNA sequence to  
566 the Rfam database (version 12.0) (60) to identify homologies from related bacteria by Blast method  
567 (E-value  $\leq 1e-5$ ).

568 After sRNA prediction, we got the normalized expression level of each sRNA for each samples.  
569 We then used WGCNA(58) method to classify the differentially expressed sRNAs as modules  
570 based on their expression pattern.

571

### 572 **sRNA knockout experiment**

573 To validate the influence on bacteria by sRNAs, we selected sRNAs that expressed significantly  
574 and dynamically to do the knockout experiment. Rli28 and ratA from the plasmid of *L. casei Zhang*  
575 were chosen. The target sequence of Rli28 is  
576 TTAATGCGATTAAAGCCACGGTAAAGGTACCGAAAGCCAGCATTAAATTGTAAAGCG  
577 TCCGCAACGGACACTTAGGCTACTCCTTTCATTAGGATTTATGGGCTTTAGGGGTTTA  
578 ACACCATAAGCACCTCCGATCGGAAATAGCCACCGCCTTAACTTCTCTACAAGC  
579 TTTAATTATACAGGAGCTTT, which locates on the plasmid from 30466 to 30656. The target  
580 sequence of ratA is  
581 TAATATAGACAGAAAAAGGGAAGCCCCGCTAGAACAGGACTTCCCATGCAAGCCGC  
582 TTCAAAGGCGGTGGCAGAAATTTAATAAACGATTTT, which locates on the plasmid from  
583 28019 to 28110. The knockout experiment was performed according to one published protocol for  
584 gene deletions in *Lactobacillus*(61), and the knockout efficiency of Rli28 was validated by RT-  
585 PCR. After knockout, we tested the cell density and pH levels of the knockout bacteria with three  
586 independent replicates.

587

### 588 **MetaPhlAn2 analysis**

589 For both metagenomic and metatranscriptomic reads, we have applied the MetaPhlAn2 and  
590 GraPhlAn software(62) to obtain the relative abundance of each species. Top abundant species of

591 all samples were used to make a dendrogram heatmap via hierarchical clustering. After the  
592 calculation of species abundance, we got differentially expressed species to analysis the influence  
593 of *L. casei Zhang* on transcription variation.

594

#### 595 **Other statistical methods**

596 Principle Component Analysis (PCA) was used to analyze the time and individual influence.  
597 Fisher Exact Test was used to obtain the enrichment of each functional cluster. Statistical figures  
598 and tables were obtained by a free statistical software R. Cluster was performed by the Cluster3.0  
599 software and the heatmap was generated by Java TreeView  
600 (<http://bonsai.hgc.jp/~mdehoon/software/cluster/software.htm>).

601

#### 602 **Abbreviations**

603 GALT: gut-associated lymphoid tissue; IBD: inflammatory bowel disease; IBS: irritable bowel  
604 syndrome; *L. casei Zhang*: *Lactobacillus paracasei* Zhang; ORFs: Open Reading Frames; PCA:  
605 Principal Component Analysis; PTR: peak-to-trough ratio; qPCR: quantitative Polymerase Chain  
606 Reaction; RPKM: Reads Per million per kilobase; SCFAs: short chain fatty acids;

607

#### 608 **Declarations**

#### 609 **Ethics approval and consent to participate**

610 The experiment was approved by the Ethics Committee of the Inner Mongolia Agricultural  
611 University (Hohhot, China). A written consent was obtained from every volunteer.

612

#### 613 **Consent for publication**

614 All volunteers participated in this paper have signed to give the consent for publication.

615

### 616 **Availability of data and material**

617 The sequences reported in this paper have been deposited in the National Center for Biotechnology

618 Information Sequence Read Archive under accession no. SRP065752.

619

### 620 **Competing interests**

621 The authors declare that they have no competing interests.

622

### 623 **Funding**

624 This research was supported by the National Natural Science Foundation of China (31720103911,

625 31622043), China Agriculture Research System (CARS-36), Inner Mongolia Science &

626 Technology Major Projects, and Inner Mongolia Science & Technology planning project

627 (201603001, 201702070). This work is partly supported by ABLife (2013-09007) granted to Y.Z.

628

### 629 **Authors' contributions**

630 H.Z. and Y.Z. led the project; H.Z., Y.Z., J.W. and Z.S. conceived and designed the project; Y.Z.,

631 H.Z., J.Q. and D.C. wrote the manuscript; X.L., J.D. and J.Z. collected samples and performed

632 experiments; D.C., C.C., and Q.Hou analyzed the data and generated graphics.

633

### 634 **Acknowledgements**

635 We would like to express our gratitude to members in Prof. Heping Zhang' team and the team  
636 from ABLife for their assistance in preparation of samples and sequencing libraries. We would  
637 like to thank Ms. Hong Wu (ABLife) for her help in language editing.

638

### 639 **Authors' information**

640 <sup>1</sup>Key Laboratory of Dairy Biotechnology and Engineering, Ministry of Education, Inner Mongolia  
641 Agricultural University, Hohhot 010018, China.

642 <sup>2</sup> Center for Genome Analysis and <sup>3</sup> Laboratory for Genome Regulation and Human Health ,  
643 ABLife, Inc., Optics Valley International Biomedical Park, Building 9-4, East Lake High-Tech  
644 Development Zone, 388 Gaoxin 2<sup>nd</sup> Road, Wuhan, Hubei 430075, China.

645 #Current address: Peking University School of Life Sciences, Golden Life Sciences Building Room  
646 326, Beijing Summer Palace Road No. 5, Haidian District, Beijing, 100089, China.

647

648

### 649 **References**

650

- 651 1. Human Microbiome Project C. 2012. Structure, function and diversity of the healthy  
652 human microbiome. *Nature* 486:207-14.
- 653 2. Sommer F, Backhed F. 2013. The gut microbiota--masters of host development and  
654 physiology. *Nat Rev Microbiol* 11:227-38.
- 655 3. Eckburg PB, Bik EM, Bernstein CN, Purdom E, Dethlefsen L, Sargent M, Gill SR, Nelson  
656 KE, Relman DA. 2005. Diversity of the human intestinal microbial flora. *Science*  
657 308:1635-8.
- 658 4. Cani PD, Delzenne NM. 2009. The role of the gut microbiota in energy metabolism and  
659 metabolic disease. *Curr Pharm Des* 15:1546-58.
- 660 5. Round JL, Mazmanian SK. 2009. The gut microbiota shapes intestinal immune  
661 responses during health and disease. *Nat Rev Immunol* 9:313-23.
- 662 6. Sekirov I, Russell SL, Antunes LC, Finlay BB. 2010. Gut microbiota in health and  
663 disease. *Physiol Rev* 90:859-904.
- 664 7. Kamada N, Seo SU, Chen GY, Nunez G. 2013. Role of the gut microbiota in immunity  
665 and inflammatory disease. *Nat Rev Immunol* 13:321-35.

- 666 8. Gibson GR, Roberfroid MB. 1995. Dietary modulation of the human colonic microbiota:  
667 introducing the concept of prebiotics. *J Nutr* 125:1401-12.
- 668 9. Claesson MJ, Jeffery IB, Conde S, Power SE, O'Connor EM, Cusack S, Harris HM,  
669 Coakley M, Lakshminarayanan B, O'Sullivan O, Fitzgerald GF, Deane J, O'Connor M,  
670 Harnedy N, O'Connor K, O'Mahony D, van Sinderen D, Wallace M, Brennan L, Stanton  
671 C, Marchesi JR, Fitzgerald AP, Shanahan F, Hill C, Ross RP, O'Toole PW. 2012. Gut  
672 microbiota composition correlates with diet and health in the elderly. *Nature* 488:178-84.
- 673 10. David LA, Maurice CF, Carmody RN, Gootenberg DB, Button JE, Wolfe BE, Ling AV,  
674 Devlin AS, Varma Y, Fischbach MA, Biddinger SB, Dutton RJ, Turnbaugh PJ. 2014. Diet  
675 rapidly and reproducibly alters the human gut microbiome. *Nature* 505:559-63.
- 676 11. Zhang Y, Brady A, Jones C, Song Y, Darton TC, Jones C, Blohmke CJ, Pollard AJ,  
677 Magder LS, Fasano A, Sztein MB, Fraser CM. 2018. Compositional and Functional  
678 Differences in the Human Gut Microbiome Correlate with Clinical Outcome following  
679 Infection with Wild-Type *Salmonella enterica* Serovar Typhi. *MBio* 9.
- 680 12. Franzosa EA, Morgan XC, Segata N, Waldron L, Reyes J, Earl AM, Giannoukos G,  
681 Boylan MR, Ciulla D, Gevers D, Izard J, Garrett WS, Chan AT, Huttenhower C. 2014.  
682 Relating the metatranscriptome and metagenome of the human gut. *Proc Natl Acad Sci*  
683 *U S A* 111:E2329-38.
- 684 13. Abu-Ali GS, Mehta RS, Lloyd-Price J, Mallick H, Branck T, Ivey KL, Drew DA, DuLong C,  
685 Rimm E, Izard J, Chan AT, Huttenhower C. 2018. Metatranscriptome of human faecal  
686 microbial communities in a cohort of adult men. *Nat Microbiol* 3:356-366.
- 687 14. Derrien M, van Hylckama Vlieg JE. 2015. Fate, activity, and impact of ingested bacteria  
688 within the human gut microbiota. *Trends Microbiol* 23:354-66.
- 689 15. Sanchez B, Delgado S, Blanco-Miguez A, Lourenco A, Gueimonde M, Margolles A.  
690 2017. Probiotics, gut microbiota, and their influence on host health and disease. *Mol*  
691 *Nutr Food Res* 61.
- 692 16. Shah NP. 2000. Probiotic bacteria: selective enumeration and survival in dairy foods. *J*  
693 *Dairy Sci* 83:894-907.
- 694 17. Besselink MG, van Santvoort HC, Buskens E, Boermeester MA, van Goor H,  
695 Timmerman HM, Nieuwenhuijs VB, Bollen TL, van Ramshorst B, Witteman BJ, Rosman  
696 C, Ploeg RJ, Brink MA, Schaapherder AF, Dejong CH, Wahab PJ, van Laarhoven CJ,  
697 van der Harst E, van Eijck CH, Cuesta MA, Akkermans LM, Gooszen HG, Dutch Acute  
698 Pancreatitis Study G. 2008. Probiotic prophylaxis in predicted severe acute pancreatitis:  
699 a randomised, double-blind, placebo-controlled trial. *Lancet* 371:651-9.
- 700 18. Kruis W, Fric P, Pokrotnieks J, Lukas M, Fixa B, Kascak M, Kamm MA, Weismueller J,  
701 Beglinger C, Stolte M, Wolff C, Schulze J. 2004. Maintaining remission of ulcerative  
702 colitis with the probiotic *Escherichia coli* Nissle 1917 is as effective as with standard  
703 mesalazine. *Gut* 53:1617-23.
- 704 19. Rolfe RD. 2000. The role of probiotic cultures in the control of gastrointestinal health. *J*  
705 *Nutr* 130:396S-402S.
- 706 20. Coelho AI, Berry GT, Rubio-Gozalbo ME. 2015. Galactose metabolism and health. *Curr*  
707 *Opin Clin Nutr Metab Care* 18:422-7.
- 708 21. Buffie CG, Bucci V, Stein RR, McKenney PT, Ling L, Gobourne A, No D, Liu H,  
709 Kinnebrew M, Viale A, Littmann E, van den Brink MR, Jenq RR, Taur Y, Sander C,  
710 Cross JR, Toussaint NC, Xavier JB, Pamer EG. 2015. Precision microbiome  
711 reconstitution restores bile acid mediated resistance to *Clostridium difficile*. *Nature*  
712 517:205-8.
- 713 22. Le Barz M, Anhe FF, Varin TV, Desjardins Y, Levy E, Roy D, Urdaci MC, Marette A.  
714 2015. Probiotics as Complementary Treatment for Metabolic Disorders. *Diabetes Metab*  
715 *J* 39:291-303.

- 716 23. Schwartz A, Taras D, Schafer K, Beijer S, Bos NA, Donus C, Hardt PD. 2010.  
717 Microbiota and SCFA in lean and overweight healthy subjects. *Obesity (Silver Spring)*  
718 18:190-5.
- 719 24. Sassone-Corsi M, Raffatellu M. 2015. No vacancy: how beneficial microbes cooperate  
720 with immunity to provide colonization resistance to pathogens. *J Immunol* 194:4081-7.
- 721 25. Hill C, Guarner F, Reid G, Gibson GR, Merenstein DJ, Pot B, Morelli L, Canani RB, Flint  
722 HJ, Salminen S, Calder PC, Sanders ME. 2014. Expert consensus document. The  
723 International Scientific Association for Probiotics and Prebiotics consensus statement on  
724 the scope and appropriate use of the term probiotic. *Nat Rev Gastroenterol Hepatol*  
725 11:506-14.
- 726 26. Matsuzaki T, Chin J. 2000. Modulating immune responses with probiotic bacteria.  
727 *Immunol Cell Biol* 78:67-73.
- 728 27. Galdeano CM, Perdigon G. 2006. The probiotic bacterium *Lactobacillus casei* induces  
729 activation of the gut mucosal immune system through innate immunity. *Clin Vaccine*  
730 *Immunol* 13:219-26.
- 731 28. Corthesy B, Gaskins HR, Mercenier A. 2007. Cross-talk between probiotic bacteria and  
732 the host immune system. *J Nutr* 137:781S-90S.
- 733 29. McNulty NP, Yatsunenkov T, Hsiao A, Faith JJ, Muegge BD, Goodman AL, Henrissat B,  
734 Oozeer R, Cools-Portier S, Gobert G, Chervaux C, Knights D, Lozupone CA, Knight R,  
735 Duncan AE, Bain JR, Muehlbauer MJ, Newgard CB, Heath AC, Gordon JI. 2011. The  
736 impact of a consortium of fermented milk strains on the gut microbiome of gnotobiotic  
737 mice and monozygotic twins. *Sci Transl Med* 3:106ra106.
- 738 30. Korem T, Zeevi D, Suez J, Weinberger A, Avnit-Sagi T, Pompan-Lotan M, Matot E, Jona  
739 G, Harmelin A, Cohen N, Sirota-Madi A, Thaiss CA, Pevsner-Fischer M, Sorek R, Xavier  
740 RJ, Elinav E, Segal E. 2015. Growth dynamics of gut microbiota in health and disease  
741 inferred from single metagenomic samples. *Science* 349:1101-6.
- 742 31. van Baarlen P, Troost F, van der Meer C, Hooiveld G, Boekschoten M, Brummer RJ,  
743 Kleerebezem M. 2011. Human mucosal in vivo transcriptome responses to three  
744 lactobacilli indicate how probiotics may modulate human cellular pathways. *Proc Natl*  
745 *Acad Sci U S A* 108 Suppl 1:4562-9.
- 746 32. Eloe-Fadrosch EA, Brady A, Crabtree J, Drabek EF, Ma B, Mahurkar A, Ravel J,  
747 Haverkamp M, Fiorino AM, Botelho C, Andreyeva I, Hibberd PL, Fraser CM. 2015.  
748 Functional dynamics of the gut microbiome in elderly people during probiotic  
749 consumption. *MBio* 6.
- 750 33. Veiga P, Pons N, Agrawal A, Oozeer R, Guyonnet D, Brazeilles R, Faurie JM, van  
751 Hylckama Vlieg JE, Houghton LA, Whorwell PJ, Ehrlich SD, Kennedy SP. 2014.  
752 Changes of the human gut microbiome induced by a fermented milk product. *Sci Rep*  
753 4:6328.
- 754 34. Veiga P, Gallini CA, Beal C, Michaud M, Delaney ML, DuBois A, Khlebnikov A, van  
755 Hylckama Vlieg JE, Punit S, Glickman JN, Onderdonk A, Glimcher LH, Garrett WS.  
756 2010. *Bifidobacterium animalis* subsp. *lactis* fermented milk product reduces  
757 inflammation by altering a niche for colitogenic microbes. *Proc Natl Acad Sci U S A*  
758 107:18132-7.
- 759 35. Hamer HM, Jonkers D, Venema K, Vanhoutvin S, Troost FJ, Brummer RJ. 2008. Review  
760 article: the role of butyrate on colonic function. *Aliment Pharmacol Ther* 27:104-19.
- 761 36. Storz G, Vogel J, Wassarman KM. 2011. Regulation by small RNAs in bacteria:  
762 expanding frontiers. *Mol Cell* 43:880-91.
- 763 37. Toledo-Arana A, Dussurget O, Nikitas G, Sesto N, Guet-Revillet H, Balestrino D, Loh E,  
764 Gripenland J, Tiensuu T, Vaitkevicius K, Barthelémy M, Vergassola M, Nahori MA,

- 765 Soubigou G, Regnault B, Coppee JY, Lecuit M, Johansson J, Cossart P. 2009. The  
766 *Listeria* transcriptional landscape from saprophytism to virulence. *Nature* 459:950-6.
- 767 38. Lahti L, Salonen A, Kekkonen RA, Salojarvi J, Jalanka-Tuovinen J, Palva A, Oresic M,  
768 de Vos WM. 2013. Associations between the human intestinal microbiota, *Lactobacillus*  
769 *rhamnosus* GG and serum lipids indicated by integrated analysis of high-throughput  
770 profiling data. *PeerJ* 1:e32.
- 771 39. Roos S, Dicksved J, Tarasco V, Locatelli E, Ricceri F, Grandin U, Savino F. 2013. 454  
772 pyrosequencing analysis on faecal samples from a randomized DBPC trial of colicky  
773 infants treated with *Lactobacillus reuteri* DSM 17938. *PLoS One* 8:e56710.
- 774 40. Cox MJ, Huang YJ, Fujimura KE, Liu JT, McKean M, Boushey HA, Segal MR, Brodie  
775 EL, Cabana MD, Lynch SV. 2010. *Lactobacillus casei* abundance is associated with  
776 profound shifts in the infant gut microbiome. *PLoS One* 5:e8745.
- 777 41. Weinstock GM. 2012. Genomic approaches to studying the human microbiota. *Nature*  
778 489:250-6.
- 779 42. Drouault S, Corthier G, Ehrlich SD, Renault P. 1999. Survival, physiology, and lysis of  
780 *Lactococcus lactis* in the digestive tract. *Appl Environ Microbiol* 65:4881-6.
- 781 43. Rees DC, Johnson E, Lewinson O. 2009. ABC transporters: the power to change. *Nat*  
782 *Rev Mol Cell Biol* 10:218-27.
- 783 44. Gutmann DA, Ward A, Urbatsch IL, Chang G, van Veen HW. 2010. Understanding  
784 polyspecificity of multidrug ABC transporters: closing in on the gaps in ABCB1. *Trends*  
785 *Biochem Sci* 35:36-42.
- 786 45. Nicholson JK, Holmes E, Kinross J, Burcelin R, Gibson G, Jia W, Pettersson S. 2012.  
787 Host-gut microbiota metabolic interactions. *Science* 336:1262-7.
- 788 46. Tan J, McKenzie C, Vuillermin PJ, Goverse G, Vinuesa CG, Mebius RE, Macia L,  
789 Mackay CR. 2016. Dietary Fiber and Bacterial SCFA Enhance Oral Tolerance and  
790 Protect against Food Allergy through Diverse Cellular Pathways. *Cell Rep* 15:2809-24.
- 791 47. Nicholson JK, Wilson ID. 2003. Opinion: understanding 'global' systems biology:  
792 metabonomics and the continuum of metabolism. *Nature Reviews Drug Discovery*  
793 2:668-676.
- 794 48. Besten GD, Eunen KV, Groen AK, Venema K, Reijngoud DJ, Bakker BM. 2013. The role  
795 of short-chain fatty acids in the interplay between diet, gut microbiota, and host energy  
796 metabolism. *Journal of Lipid Research* 54:2325-2340.
- 797 49. Kostic AD, Xavier RJ, Gevers D. 2014. The microbiome in inflammatory bowel disease:  
798 current status and the future ahead. *Gastroenterology* 146:1489-99.
- 799 50. Sivieri K, Morales ML, Adorno MA, Sakamoto IK, Saad SM, Rossi EA. 2013.  
800 *Lactobacillus acidophilus* CRL 1014 improved "gut health" in the SHIME reactor. *BMC*  
801 *Gastroenterol* 13:100.
- 802 51. Belenguer A, Duncan SH, Calder AG, Holtrop G, Louis P, Lobley GE, Flint HJ. 2006.  
803 Two routes of metabolic cross-feeding between *Bifidobacterium adolescentis* and  
804 butyrate-producing anaerobes from the human gut. *Appl Environ Microbiol* 72:3593-9.
- 805 52. Johansson ML, Nobaek S, Berggren A, Nyman M, Bjorck I, Ahrne S, Jeppsson B, Molin  
806 G. 1998. Survival of *Lactobacillus plantarum* DSM 9843 (299v), and effect on the short-  
807 chain fatty acid content of faeces after ingestion of a rose-hip drink with fermented oats.  
808 *Int J Food Microbiol* 42:29-38.
- 809 53. Wang L, Zhang J, Guo Z, Kwok L, Ma C, Zhang W, Lv Q, Huang W, Zhang H. 2014.  
810 Effect of oral consumption of probiotic *Lactobacillus plantarum* P-8 on fecal microbiota,  
811 SIgA, SCFAs, and TBAs of adults of different ages. *Nutrition* 30:776-83 e1.
- 812 54. Vogel J, Bartels V, Tang TH, Churakov G, Slagter-Jager JG, Huttenhofer A, Wagner EG.  
813 2003. RNomics in *Escherichia coli* detects new sRNA species and indicates parallel  
814 transcriptional output in bacteria. *Nucleic Acids Res* 31:6435-43.



- 815 55. Wassarman KM. 2002. Small RNAs in bacteria: diverse regulators of gene expression in  
816 response to environmental changes. *Cell* 109:141-4.
- 817 56. Waters LS, Storz G. 2009. Regulatory RNAs in bacteria. *Cell* 136:615-28.
- 818 57. Langmead B, Salzberg SL. 2012. Fast gapped-read alignment with Bowtie 2. *Nat*  
819 *Methods* 9:357-9.
- 820 58. Langfelder P, Horvath S. 2008. WGCNA: an R package for weighted correlation network  
821 analysis. *BMC Bioinformatics* 9:559.
- 822 59. Robinson MD, McCarthy DJ, Smyth GK. 2010. edgeR: a Bioconductor package for  
823 differential expression analysis of digital gene expression data. *Bioinformatics* 26:139-  
824 40.
- 825 60. Nawrocki EP, Burge SW, Bateman A, Daub J, Eberhardt RY, Eddy SR, Floden EW,  
826 Gardner PP, Jones TA, Tate J, Finn RD. 2015. Rfam 12.0: updates to the RNA families  
827 database. *Nucleic Acids Res* 43:D130-7.
- 828 61. Lambert JM, Bongers RS, Kleerebezem M. 2007. Cre-lox-based system for multiple  
829 gene deletions and selectable-marker removal in *Lactobacillus plantarum*. *Appl Environ*  
830 *Microbiol* 73:1126-35.
- 831 62. Truong DT, Franzosa EA, Tickle TL, Scholz M, Weingart G, Pasolli E, Tett A,  
832 Huttenhower C, Segata N. 2015. MetaPhlan2 for enhanced metagenomic taxonomic  
833 profiling. *Nat Methods* 12:902-3.

834

835

## 836 Figure legends

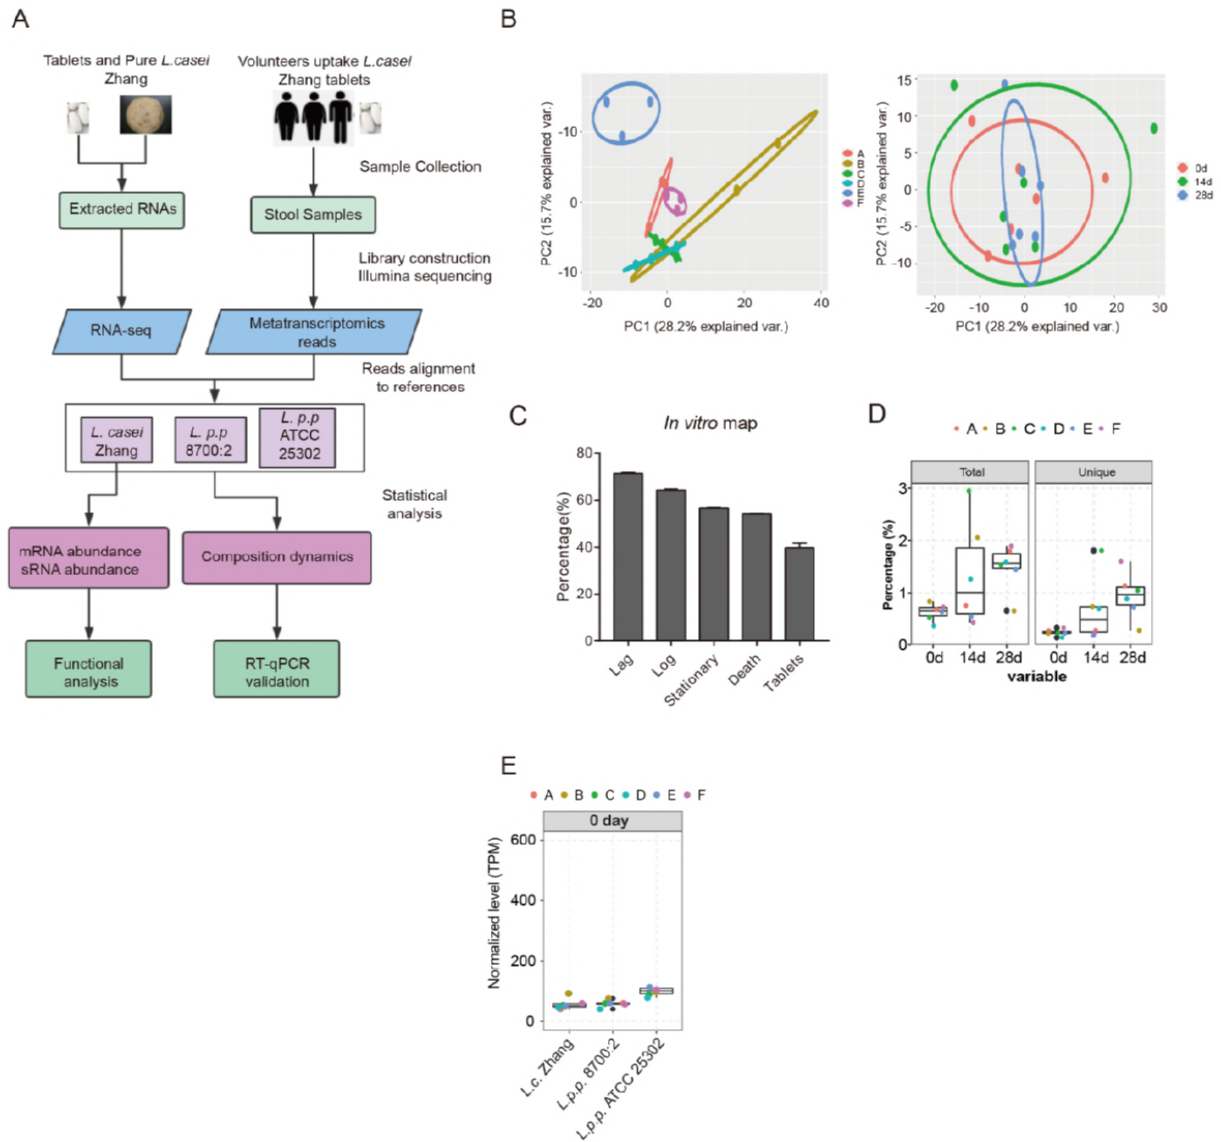

837

838 **Figure 1. Experimental design and the transcriptional profile of an ingested probiotic**  
839 **bacteria.**

840 (A) The flow diagram of this study. Firstly, we took stool samples from six volunteers ingesting *L.*  
841 *casei* Zhang tablets and sequenced the metatranscriptomic reads. In vitro samples were also  
842 used to construct RNA-seq libraries, including tablets and cultured pure *L. casei* Zhang. Then  
843 we aligned the filtered reads to the reference genomes as well as databases, and calculated the

844 composition dynamics of corresponding species, as well as gene expression abundance. Last,  
845 we validated the results by qPCR methods using the original stool samples.

846 (B) PCA analysis showing a large inter-individual variation among all 18 metatranscriptomic  
847 samples. The samples were separated by individual classification (left) or by temporal  
848 classification (right).

849 (C) Bar plot showing the mapping percentage of *in vitro* samples by aligning the RNA-seq reads  
850 to the *L. casei* Zhang genome sequence.

851 (D) Box plot showing the mapping percentage of *in vivo* samples by aligning the RNA-seq reads  
852 to the *L. casei* Zhang genome sequence. Left panel was the total mapped reads, and right was  
853 the uniquely mapped reads. Dots in each box represent six volunteers.

854 (E) Box plot showing the mapping percentage of *in vivo* samples by aligning the RNA-seq reads  
855 to three closely related strains. Samples at 0 day were chosen for representation.  
856

Dynamic transcription of probiotic mRNAs and sRNAs in human gut

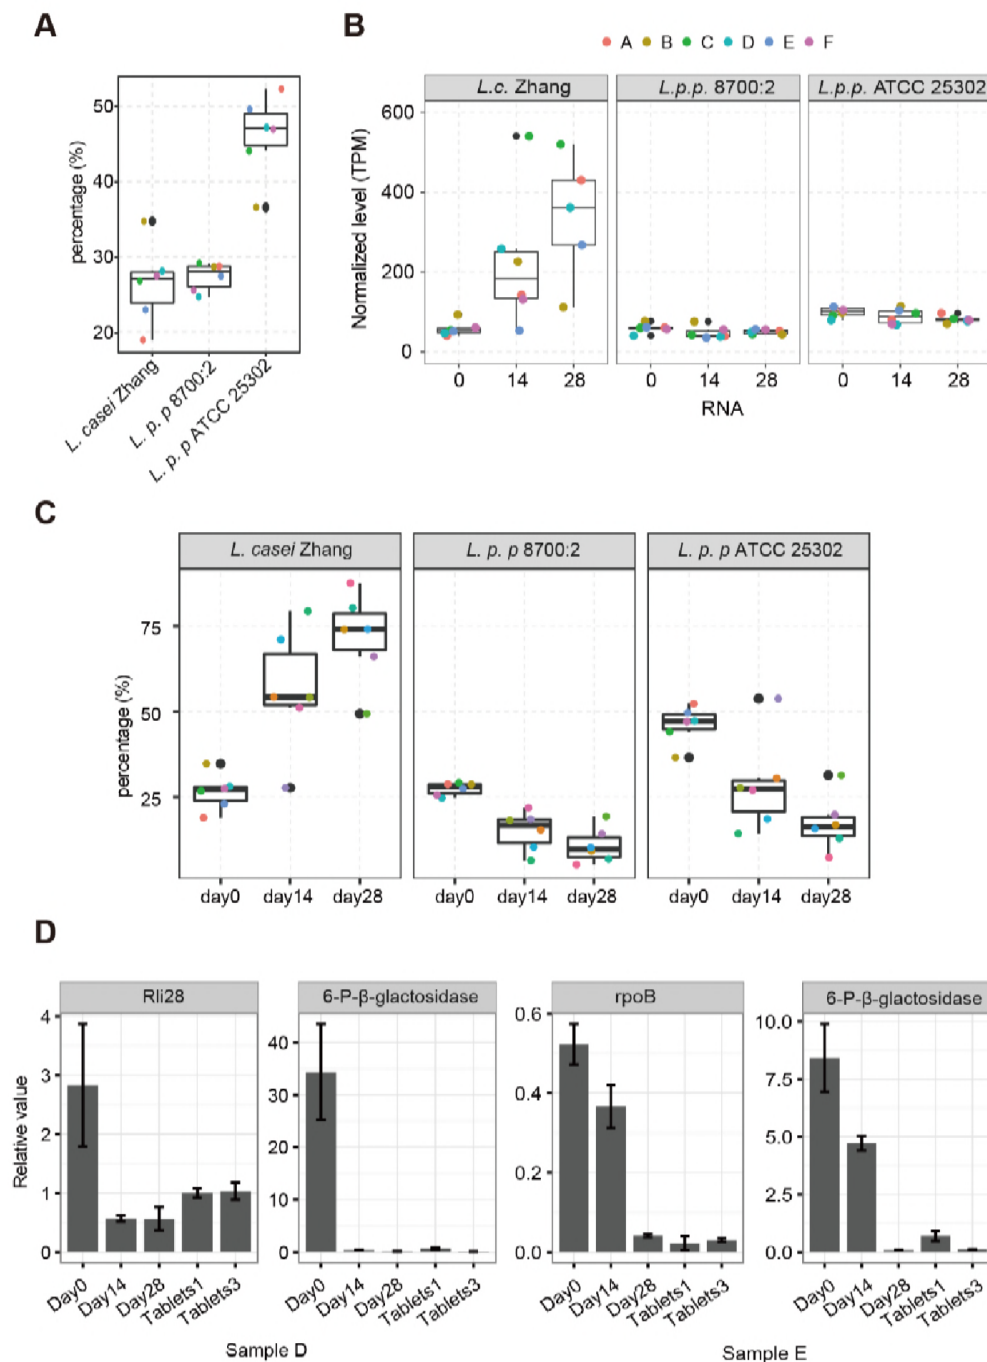

857

858 **Figure 2. Transcripts from the ingested *L. casei* Zhang increase significantly after ingestion.**

859 **(A)** Box plot showing the percentage of mapped reads in each species to the total mapped reads in  
860 these three species. Dots in each box represent six volunteers.

861 **(B)** Box plot showing the mapping percentage of *in vivo* samples by aligning the RNA-seq reads

862 to three closely related strains. Samples at three time points were chosen for representation.

863 (C) Box plot showing the mapping percentage of reads that were aligned to the combined genome

864 sequences of these three species.

865 (D) Bar plot for the RNA/DNA ratio of all these genes by PCR showing the high level expression

866 in the resident *L. casei* Zhang than the ingested grown in in vivo or in vitro (tablets s1 and ts3

867 samples).

868

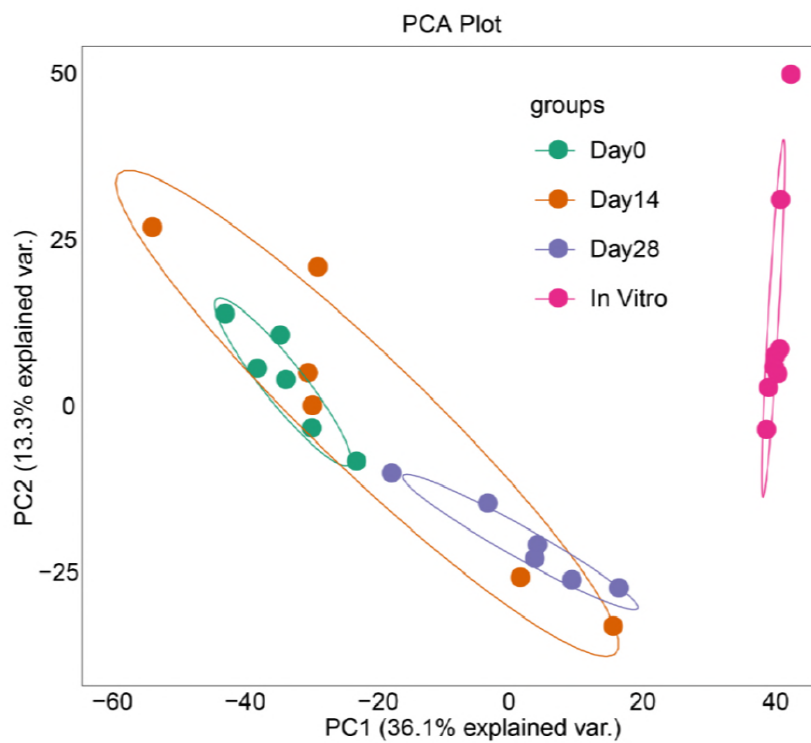

869

870 **Figure 3. Gene expression patterns of *L. casei/paracasei* in vivo are distinct from those in vitro.**

871 PCA analysis showing the distinct expression pattern of *in vitro* samples compared with *in vivo*

872 samples.

873

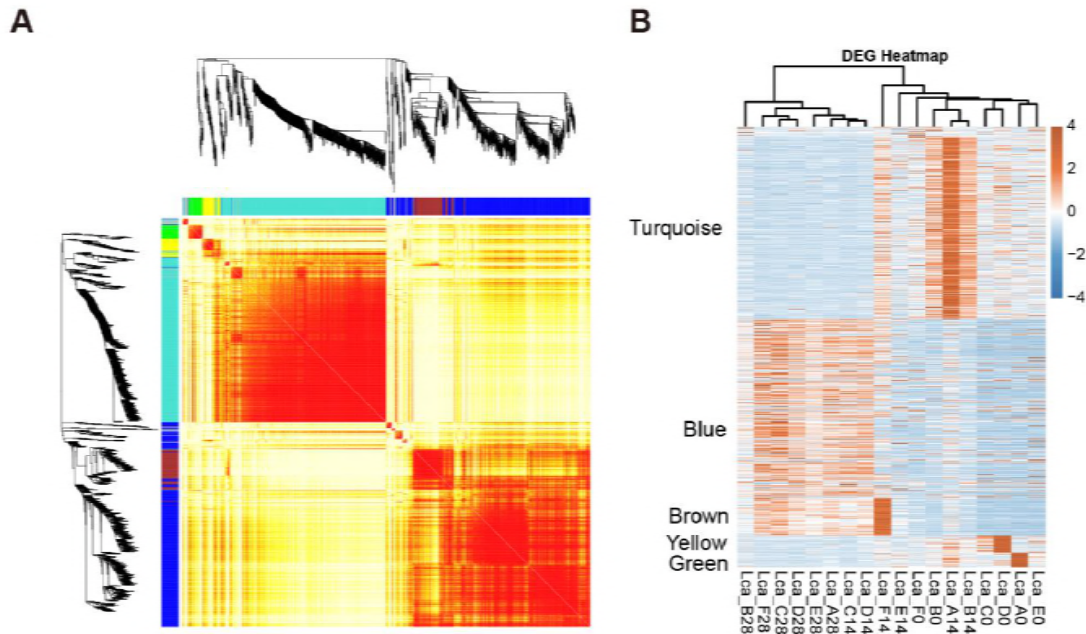

874

875 **Figure 4. The transcriptional dynamics of differentially expressed genes in human gut upon**  
876 **probiotic ingestion.**

877 (A) Clustering heatmap showing the dynamical expression patterns of genes in different modules.

878 (B) Heatmap showing the expression pattern of genes in *in vivo* samples. The genes were sorted  
879 by clustering modules.

880

Dynamic transcription of probiotic mRNAs and sRNAs in human gut

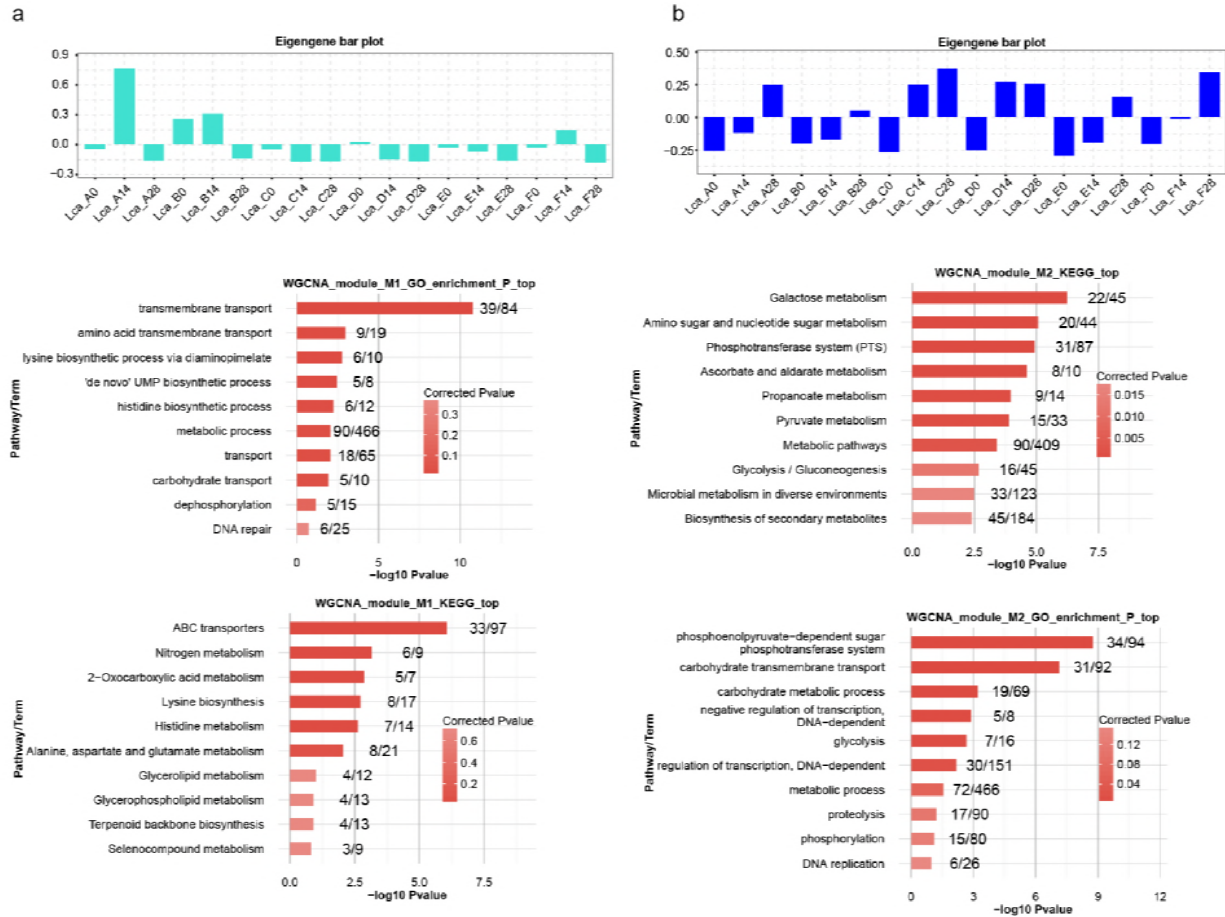

881

882 Figure 5. Expression pattern and functional analysis of two modules obtained by WGCNA analysis.

883 (A) The top panel is the bar plot of eigengene value for turquoise module (first module); the middle

884 panel is the bar plot showing the enriched GO biological processes of turquoise module; the

885 bottom panel is the bar plot showing the enriched KEGG pathways of turquoise module.

886 (B) The same with (A) but for the blue module (second module).

887

Dynamic transcription of probiotic mRNAs and sRNAs in human gut

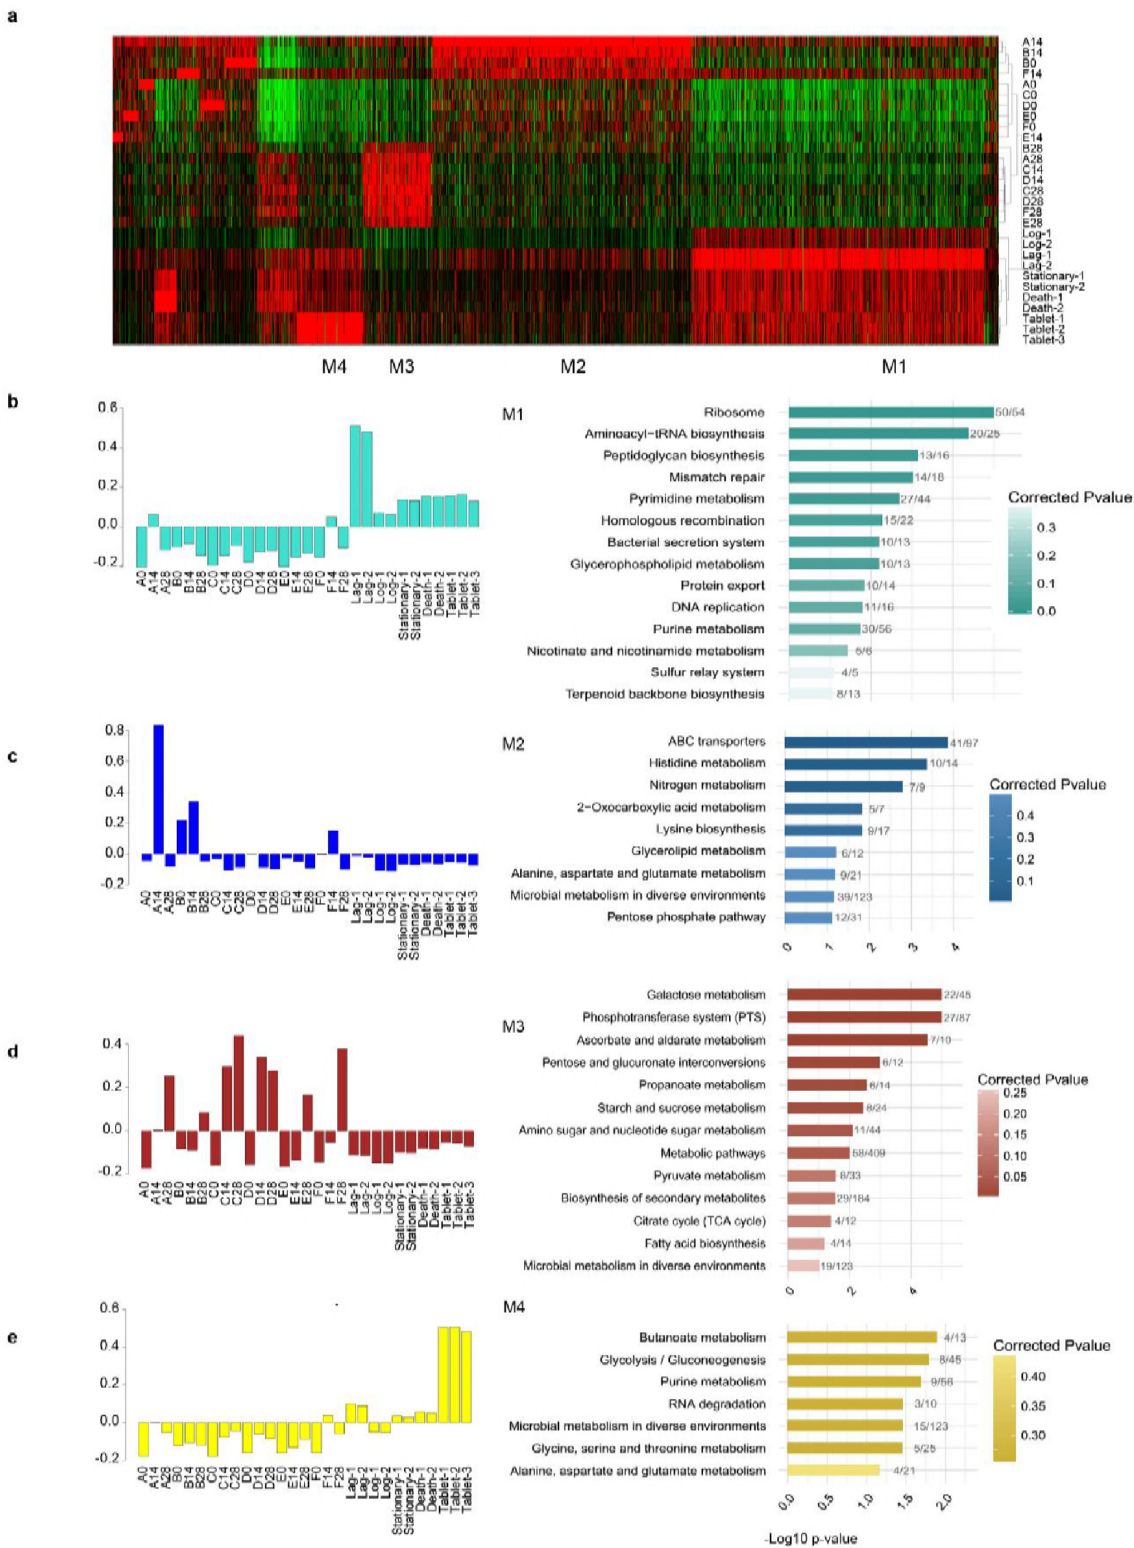



889 **Figure 6 Transcriptional dynamics of the ingested *L. casei* Zhang in human gut.**

890 (A) Heatmap representation of differentially expressed genes mapped onto the *L. casei* Zhang  
891 genome, ranked by the co-expression modules.

892 (B-E) Bar plots of eigengene value and KEGG pathway enrichment of corresponding genes in  
893 module 1 (b), module 2 (c), module 3 (d), and module 4 (e).

894 (F) The overlapping genes between WGCNA results from *L. casei* Zhang and HMP mapping result.

895

896

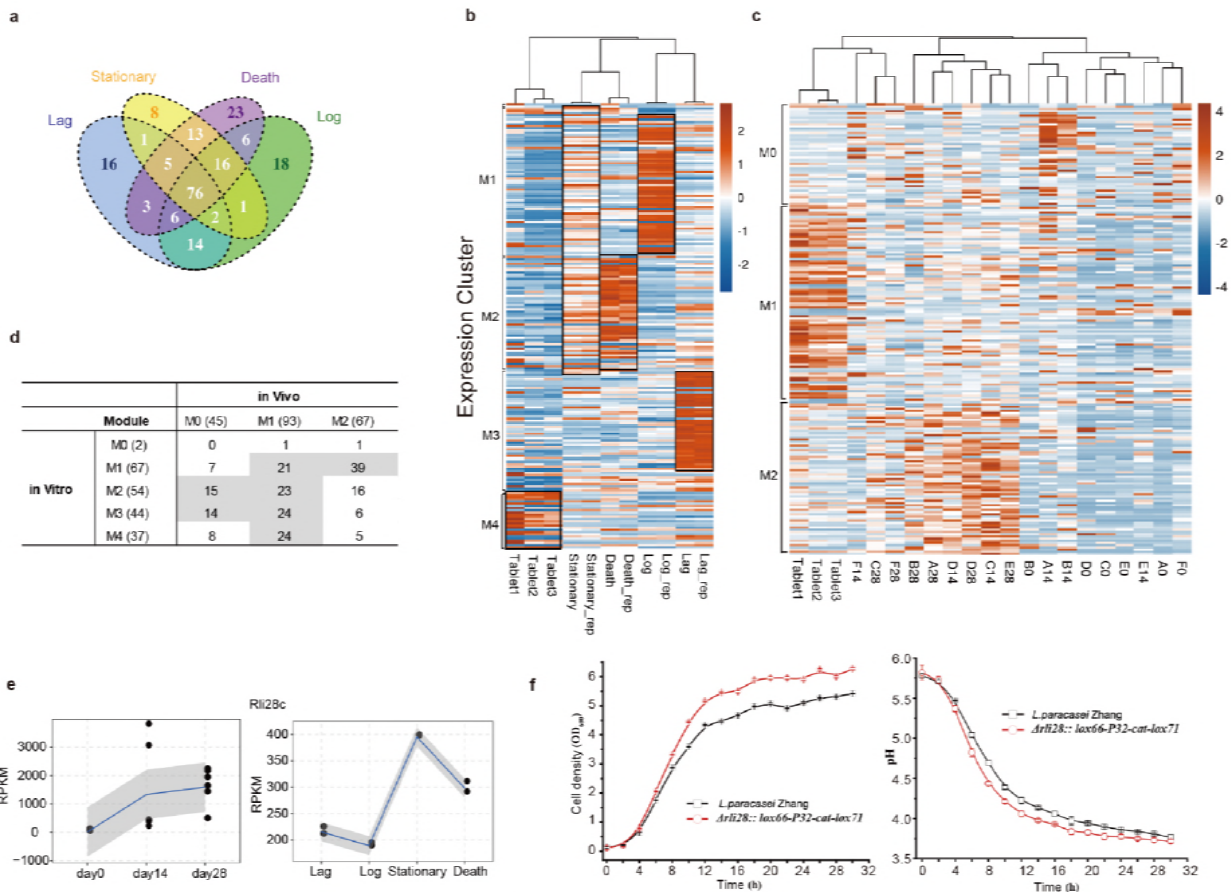

897

898 **Figure 7 Expression profile of sRNAs and the function of rli28c sRNA.**

899 (A) Venn diagram showed the sRNA detection overlap among the four growth stages *in vitro*.

- 900 **(B)** Heatmap presentation of the expression pattern for the *in vitro* and tablets samples by WGCNA  
901 clustering. Black rectangle represents the highly expressed sRNAs in the corresponding samples.  
902 **(C)** The same with **(B)** but for the *in vivo* and tablets samples.  
903 **(D)** The overlapped sRNAs numbers for major modules classified by WGCNA for *in vitro* and *in*  
904 *vivo* shown in (b) and (c).  
905 **(E)** The expression level line plot of RPKM values for rli28c sRNAs in *in vivo* and *in vitro* samples,  
906 respectively.  
907 **(F)** The cell density (left) and pH value of the growth medium (right) plot by time with (red) and  
908 without (black) the rli28c sRNA knockout.
